# Supplementary material for: ACPT gene is inactivated in mammalian lineages that lack enamel and teeth
Source: bioRxiv or medRxiv preprint supplement (doi:10.1101/861633), 2019-12-02
Supplement: Supplementary file [file media-1.pdf]

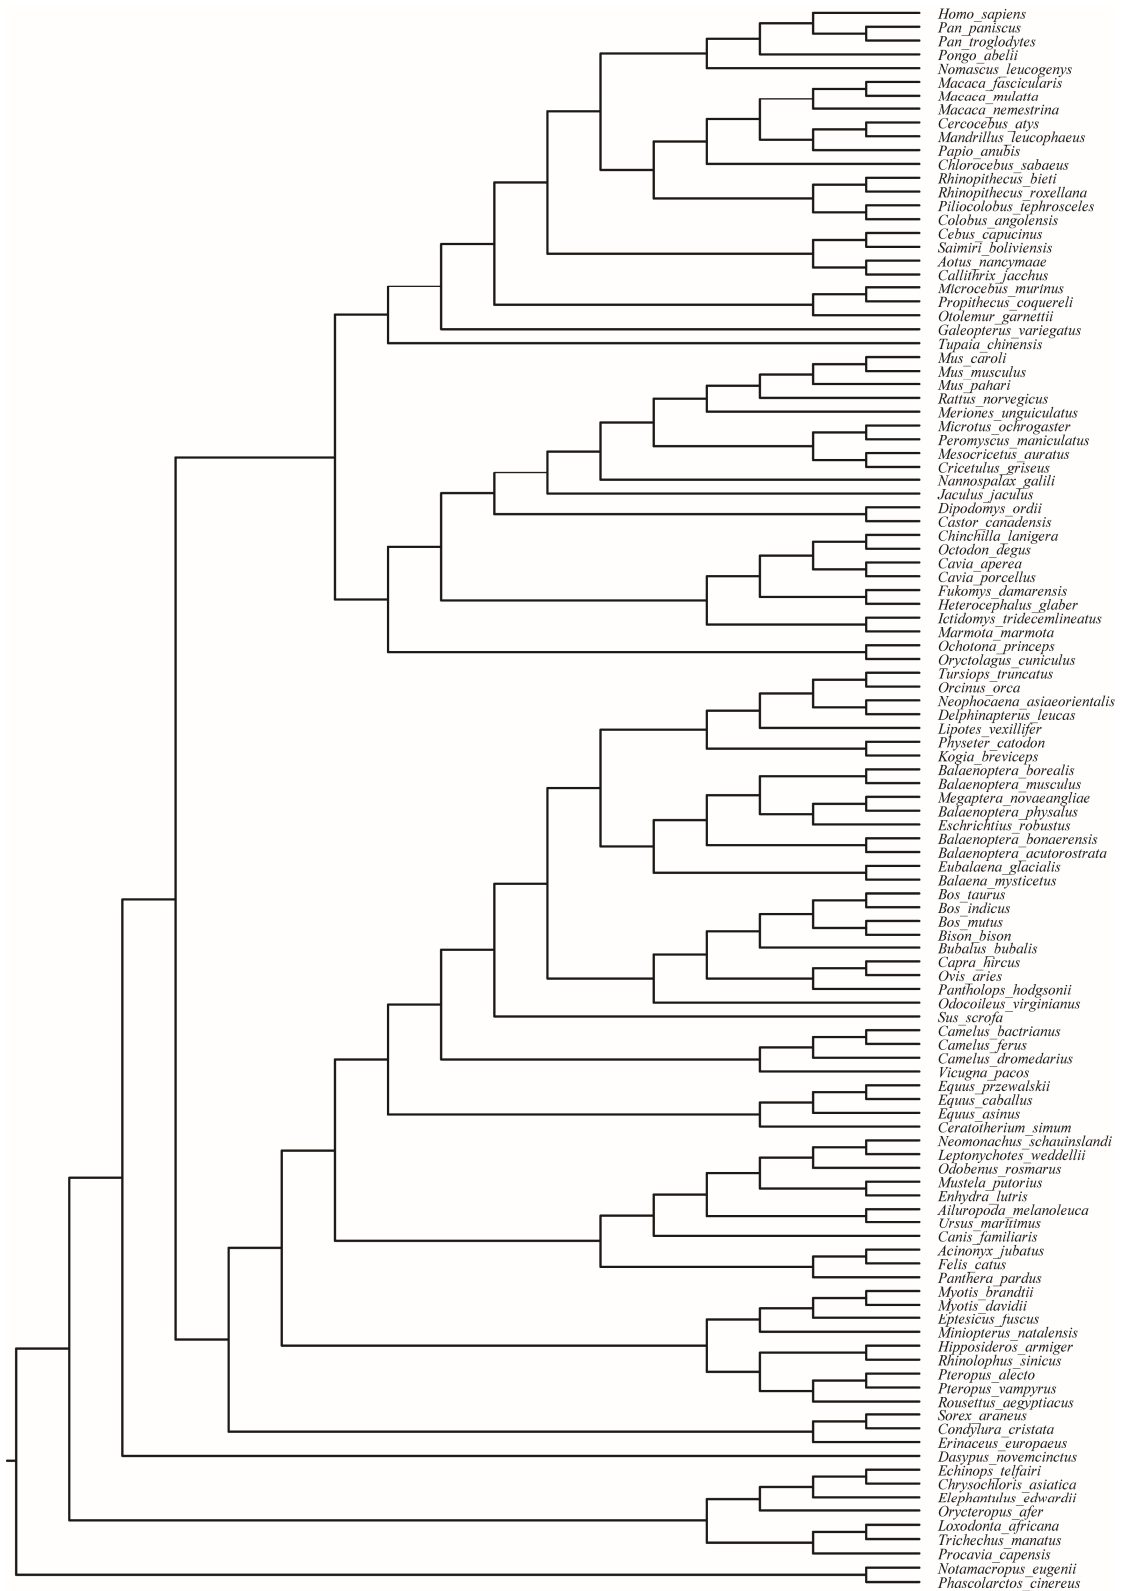

Appendix Figure 1 The tree topology of ACPT used to conduct the selective pressure analysis in PAML. The phylogeny is based on OrthoMaM (from: [http://orthomam2.mbb.univ-montp2.fr/OrthoMaM\\_v10b10/](http://orthomam2.mbb.univ-montp2.fr/OrthoMaM_v10b10/)) and some previous researches (Celine et al. 2019; Waddell et al. 2001; Sergey et al. 2007; Zhou et al. 2012; Gatesy et al. 2013; Kuntner et al. 2011)



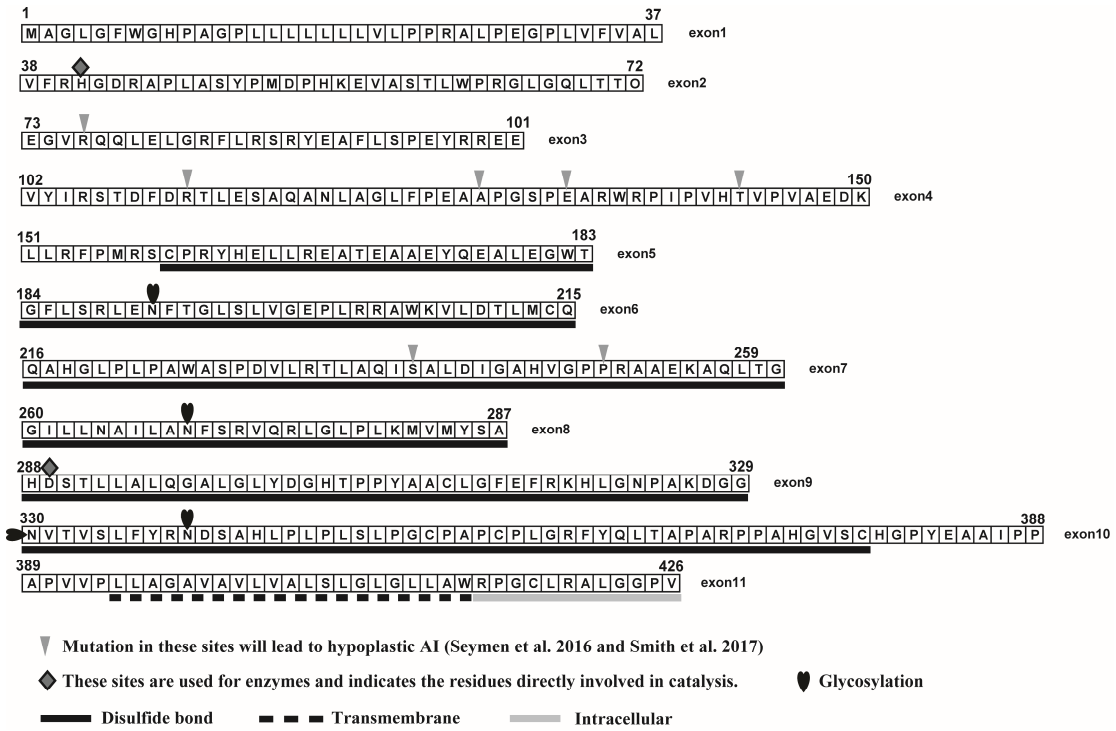

Appendix Figure 3 The information of mutation sites in ACPT protein sequence about amelogenesis imperfecta.

Appendix Table 1 Mammalian species used in this study and the sources of sequences.

| Species                           | ACPT                   | Species                             | ACPT                   | Species                       | ACPT                   |
|-----------------------------------|------------------------|-------------------------------------|------------------------|-------------------------------|------------------------|
| <i>Acinonyx_jubatus</i>           | XM_027037126.1         | <i>Felis_catus</i>                  | ENSFCAG0000001872<br>7 | <i>Oryctolagus_cuniculus</i>  | XM_017340604.1         |
| <i>Ailuropoda_melanoleuca</i>     | ENSAMEG000000128<br>61 | <i>Fukomys_damarensis</i>           | ENSFDAG0000001487<br>4 | <i>Otolemur_garnettii</i>     | XM_003801446.2         |
| <i>Aotus_nancymaae</i>            | ENSANAG000000322<br>61 | <i>Galeopterus_variegatus</i>       | 103608037              | <i>Ovis_aries</i>             | ENSOARG000000141<br>52 |
| <i>Balaenoptera_acutorostrata</i> | XM_007179955.1         | <i>Gorilla_gorilla</i>              | —                      | <i>Pan_paniscus</i>           | ENSPAG0000001092<br>7  |
| <i>Balaena_mysticetus</i>         | bmy_14018              | <i>Heterocephalus_glaber</i>        | ENSHGLG0000000494<br>9 | <i>Pan_troglodytes</i>        | ENSPTRG0000001135<br>2 |
| <i>Bison_bison</i>                | 104995692              | <i>Hipposideros_armiger</i>         | 109390983              | <i>Panthera_pardus</i>        | 109252997              |
| <i>Bos_taurus</i>                 | ENSBTAG0000001511<br>5 | <i>Homo_sapiens</i>                 | ENSG00000142513        | <i>Pantholops_hodgsonii</i>   | XM_005955418.1         |
| <i>Bos_indicus</i>                | 109571909              | <i>Ictidomys_tridecemlineatus</i>   | ENSSTOG00000010097     | <i>Papio_anubis</i>           | ENSPANG0000001066<br>5 |
| <i>Bos_mutus</i>                  | 102283597              | <i>Jaculus_jaculus</i>              | ENSJJAG00000014058     | <i>Peromyscus_maniculatus</i> | ENSPEMG000000089<br>09 |
| <i>Bubalus_bubalis</i>            | 102407119              | <i>Lagenorhynchus_obliquidentis</i> | —                      | <i>Phascolarctos_cinereus</i> | 110197749              |
| <i>Callithrix_jacchus</i>         | ENSCJAG0000001668<br>4 | <i>Leptonychotes_weddellii</i>      | 102742150              | <i>Phocoena_phocoena</i>      | —                      |
| <i>Canis_familiaris</i>           | ENSCAFG0000000292<br>0 | <i>Lipotes_vexillifer</i>           | XM_007463413.1         | <i>Physeter_catodon</i>       | 102977978              |

|                               |                        |                               |                        |                                  |                        |
|-------------------------------|------------------------|-------------------------------|------------------------|----------------------------------|------------------------|
| <i>Cavia_aperea</i>           | ENSCAPG0000000161<br>1 | <i>Loxodonta_africana</i>     | XM_003406840.2         | <i>Ptilocolobus_tephrosceles</i> | 111519955              |
| <i>Cavia_porcellus</i>        | ENSCPOG0000002680<br>6 | <i>Macaca_fascicularis</i>    | ENSMFAG0000000365<br>3 | <i>Pongo_abelii</i>              | ENSPPYG0000001029<br>4 |
| <i>Camelus_bactrianus</i>     | 105062672              | <i>Macaca_mulatta</i>         | ENSMMUG000000035<br>83 | <i>Procapra_capensis</i>         | ENSPCAG0000000363<br>2 |
| <i>Camelus_dromedarius</i>    | 105100227              | <i>Macaca_nemestrina</i>      | ENSMNEG0000003724<br>5 | <i>Propithecus_coquereli</i>     | ENSPCOG0000002491<br>1 |
| <i>Camelus_ferus</i>          | 102516486              | <i>Mandrillus_leucophaeus</i> | ENSMLEG0000001943<br>1 | <i>Pteropus_alecto</i>           | 102898726              |
| <i>Capra_hircus</i>           | 102191826              | <i>Marmota_marmota</i>        | 107151208              | <i>Pteropus_vampyrus</i>         | ENSPVAG0000000343<br>2 |
| <i>Castor_canadensis</i>      | 109683865              | <i>Meriones_unguiculatus</i>  | 110541101              | <i>Rattus_norvegicus</i>         | ENSRNOG000000216<br>59 |
| <i>Ceratotherium_simum</i>    | 101393590              | <i>Mesocricetus_auratus</i>   | ENSMAUG0000001689<br>5 | <i>Rhinopithecus_bieti</i>       | ENSRBIG0000002732<br>9 |
| <i>Cebus_capucinus</i>        | ENSCCAG0000003780<br>2 | <i>Miniopterus_natalensis</i> | 107531832              | <i>Rhinopithecus_roxellana</i>   | ENSRROG000000295<br>16 |
| <i>Cercocebus_atys</i>        | ENSCATG0000003216<br>6 | <i>Microcebus_murinus</i>     | ENSMICG0000000521      | <i>Rhinolophus_sinicus</i>       | 109452514              |
| <i>Chrysochloris_asiatica</i> | XM_006868138.1         | <i>Microtus_ochrogaster</i>   | ENSMOCG0000002266<br>8 | <i>Rousettus_aegyptiacus</i>     | 107500452              |
| <i>Chinchilla_lanigera</i>    | ENSCLAG0000000602<br>3 | <i>Mus_caroli</i>             | XM_021167373.1         | <i>Saimiri_boliviensis</i>       | ENSSBOG0000002670<br>1 |
| <i>Chlorocebus_sabaeus</i>    | ENSCSAG0000000207<br>5 | <i>Mus_musculus</i>           | ENSMUSG0000001277<br>7 | <i>Sorex_araneus</i>             | XM_004619766.1         |

|                              |                        |                                    |                        |                               |                        |
|------------------------------|------------------------|------------------------------------|------------------------|-------------------------------|------------------------|
| <i>Choloepus_hoffmanni</i>   | —                      | <i>Mus_pahari</i>                  | XM_021222251.1         | <i>Sus_scrofa</i>             | ENSSSCG0000002473<br>6 |
| <i>Colobus_angolensis</i>    | ENSCANG0000002539<br>4 | <i>Mustela_putorius</i>            | ENSMPUG0000000161<br>0 | <i>Trichechus_manatus</i>     | 101344314              |
| <i>Condylura_cristata</i>    | XM_004694037.1         | <i>Myotis_brandtii</i>             | 102249381              | <i>Tupaia_chinensis</i>       | 102500938              |
| <i>Cricetulus_griseus</i>    | ENSCGRG0000100368<br>7 | <i>Myotis_davidii</i>              | 102769794              | <i>Tursiops_truncatus</i>     | ENSTTRG0000001104<br>7 |
| <i>Dasypus_novemcinctus</i>  | XM_023585546.1         | <i>Myotis_lucifugus</i>            | —                      | <i>Ursus_maritimus</i>        | 103657347              |
| <i>Delphinapterus_leucas</i> | 111180510              | <i>Nannopalax_galili</i>           | ENSNGAG0000002091<br>5 | <i>Vicugna_pacos</i>          | ENSVPAG0000000970<br>8 |
| <i>Dipodomys_ordii</i>       | ENSDORG0000001363<br>2 | <i>Neomonachus_schauinslandi</i>   | 110572992              | <i>Orycteropus_afer</i>       | XM_007957636.1         |
| <i>Echinops_telfairi</i>     | XM_004710452.1         | <i>Neophocaena_asiaeorientalis</i> | XM_024768516.1         | <i>Equus_caballus</i>         | XM_001917445.3         |
| <i>Elephantulus_edwardii</i> | 102863577              | <i>Nomascus_leucogenys</i>         | ENSNLEG0000000574<br>7 | <i>Erinaceus_europaeus</i>    | XM_007531289.1         |
| <i>Enhydra_lutris</i>        | 111160580              | <i>Notamacropus_eugenii</i>        | ENSMEUG0000000852<br>4 | <i>Eschrichtius_robustus</i>  | Gonem-blast            |
| <i>Eptesicus_fuscus</i>      | 103297603              | <i>Ochotona_princeps</i>           | ENSOPRG0000000735<br>1 | <i>Odocoileus_virginianus</i> | 110135451              |
| <i>Equus_asinus</i>          | 106845328              | <i>Octodon_degus</i>               | ENSODEG0000001584<br>9 | <i>Orcinus_orca</i>           | 101283727              |
| <i>Equus_przewalskii</i>     | 103540878              | <i>Odobenus_rosmarus</i>           | 101374821              |                               |                        |

Appendix Table 2 The genome information of cetacean species used in this study.

| Species                           | Version                    | Coverage | Genebank Assembly Accession                                                                                             | Assembly method                          | Sequencing technology |
|-----------------------------------|----------------------------|----------|-------------------------------------------------------------------------------------------------------------------------|------------------------------------------|-----------------------|
| <i>Balaena mysticetus</i>         | Database Statistics (v1.0) | ~150x    | Source: The Bowhead Whale Genome Resource ( <a href="http://www.bowhead-whale.org/">http://www.bowhead-whale.org/</a> ) | ALLPATHS-LG                              | Illumina HiSeq        |
| <i>Balaenoptera bonaerensis</i>   | ASM97880v1                 | 60x      | GCA_000978805.1                                                                                                         | PLATANUS v. 1.2.1                        | Illumina HiSeq2000    |
| <i>Balaenoptera acutorostrata</i> | BalAcu1.0                  | 92x      | GCA_000493695.1                                                                                                         | SOAPdenovo v. 16-Mar-2012                | Illumina HiSeq 2000   |
| <i>Eschrichtius robustus</i>      | EscRob_v1_BIU<br>U         | 40.5x    | GCA_004363415.1                                                                                                         | DISCOVAR de novo v. discovardenovo-52488 | Illumina HiSeq        |
| <i>Kogia breviceps</i>            | KogBre_v1_BIU<br>U         | 38.8x    | GCA_004363705.1                                                                                                         | DISCOVAR de novo v. discovardenovo-52488 | Illumina HiSeq        |
| <i>Megaptera novaeangliae</i>     | megNov1                    | 102.0x   | GCA_004329385.1                                                                                                         | Meraculous + HiRise v. Feb-2016          | Illumina HiSeq        |

Appendix Table 3 The SRA information of 4 baleen whales species used in this study.

| Species                      | Accession  | Library name     | Sample       | Size   | Relative information                                                              |
|------------------------------|------------|------------------|--------------|--------|-----------------------------------------------------------------------------------|
| <i>Balaenoptera musculus</i> | SRX2901261 | Bmu_8065(Bmus_1) | cell culture | 45.3Gb | 1 ILLUMINA (Illumina HiSeq 2000) run: 559.5M spots, 113G bases, 45.3Gb downloads  |
| <i>Balaenoptera borealis</i> | SRX2901260 | Bbo_E91(Bbor_1)  | cell culture | 20.9Gb | 1 ILLUMINA (Illumina HiSeq 2500) run: 185.8M spots, 33.5G bases, 20.9Gb downloads |
|                              | SRX2901259 | Bbo_D27(Bbor_2)  | cell culture | 20.5Gb | 1 ILLUMINA (Illumina HiSeq 2500) run: 184.5M spots, 33.2G bases, 20.5Gb downloads |
| <i>Eubalaena glacialis</i>   | SRX2901265 | Egl_F68(Egla_1)  | cell culture | 20.7Gb | 1 ILLUMINA (Illumina HiSeq 2500) run: 186M spots, 33.5G bases, 20.7Gb downloads   |
| <i>Balaenoptera physalus</i> | SRX2901262 | Bph_4966_PE300_1 | cell culture | 17.1Gb | 1 ILLUMINA (Illumina HiSeq 2000) run: 205M spots, 41.4G bases, 17.1Gb downloads   |

Appendix Table 4 The information of exon/intron boundary in relative whales (obtained by BLAST by using python script *in silico*)

| Species                           | Exon1 | Intron1       | Exon2             | Intron2               |
|-----------------------------------|-------|---------------|-------------------|-----------------------|
| <i>Balaena mysticetus</i>         | ..... | .....CTCCCCAG | GTGTTC.....ACCGGG | GTGAGAAG.....GTCCCCAG |
| <i>Balaenoptera bonaerensis</i>   | ..... | .....CTCCCCAG | GTGTTC.....GCCGGG | GTGAGAAG.....GTCCCCAG |
| <i>Balaenoptera acutorostrata</i> | ..... | .....CTCCCCAG | GTGTTC.....ACCGGG | GTGAGAAG.....GTACCCAG |
| <i>Eubalaena japonica</i>         | ..... | .....CTCCCCAC | GTGTTC.....ACCGGG | GTGAGAAG.....GTCCCCAG |
| <i>Eschrichtius robustus</i>      | ..... | .....CTCCCCAG | GTGTTC.....ACCGGG | GTGAGAAG.....GTCCCCAG |
| <i>Megaptera novaeangliae</i>     | ..... | .....CTCCCCAG | GTGTTC.....GCCGGG | GTGAGAAG.....GTCCCCAG |
| <i>Kogia breviceps</i>            |       |               |                   |                       |



Continued table

| Exon3             | Intron3                               | Exon4             | Intron4                               | Exon5             |
|-------------------|---------------------------------------|-------------------|---------------------------------------|-------------------|
| GAAGGG.....GAGGAG | <b>GT</b> ACTGCC.....GCACCC <b>AG</b> | GTGTAC.....GACAAG | <b>GT</b> CAGGGG.....TCTTCC <b>AG</b> | CTGCTG.....TGGACG |
| GAAGGG.....GAGGAG | <b>GT</b> ACTGCC.....GCACCC <b>AG</b> | GTGTAC.....GACAAG | <b>GT</b> CAGGGG.....TCCTCC <b>AG</b> | CTGCTG.....TGGACG |
| GAAGGG.....GAGGAG | <b>GT</b> ACTGCC.....GCACCC <b>AG</b> | GTGTAC.....GACAAG | <b>GT</b> CAGGGG.....NNNNNNNN         | NNNNNN.....TGGACG |
| GAAGGG.....GAGGAG | <b>GT</b> ACTGCC.....GCACCC <b>AG</b> | GTGTAC.....GACAAG | <b>GT</b> CAGGGG.....TCCTCC <b>AG</b> | CTGCTG.....TGGACG |
| GAAGGG.....GAGGAG | <b>GT</b> ACTGCC.....GCACCC <b>AG</b> | GTGTAC.....GACAAG | <b>GT</b> CAGGGG.....TCCTCC <b>AG</b> | CTGCTG.....TGGACG |
| GAAGGG.....GAGGAG | <b>GT</b> ACTGCC.....GCACCC <b>AG</b> | GTGTAC.....GACAAG | <b>GT</b> CAGGGG.....TCCTCC <b>AG</b> | CTGCTG.....TGGACG |
|                   | .....GCACCC <b>AG</b>                 | GTGTAC.....GACAAG | <b>GT</b> CAGGGG.....TCCTCC <b>AG</b> | CTGCTG.....TGGACG |

Continued table

| Intron5                               | Exon6             | Intron6                               | Exon7                | Intron7                               |
|---------------------------------------|-------------------|---------------------------------------|----------------------|---------------------------------------|
| <b>GT</b> GAGCAG.....GCATCC <b>AG</b> | GATTTC.....TGCCAG | <b>GT</b> GGGTCC.....CTCCCC <b>AG</b> | CAAGCC.....CTGGGG    | <b>GT</b> GAGGTG.....CCTGTC <b>AG</b> |
| <b>GT</b> GAGCAC.....GCGTCC <b>AG</b> | GACTTC.....TGCCAG | <b>GT</b> GGGTCC.....CTCCCC <b>AG</b> | CAAGCC.....CTGGGG    | <b>GT</b> GAGGTG.....CCTGTC <b>AG</b> |
| <b>GT</b> GAGCAG.....GCGTCC <b>AG</b> | GACTTC.....TGCCAG | <b>GT</b> GGGTCC.....CTCCCC <b>AG</b> | CAAGCC.....CTGGGG    | <b>GT</b> GAGGTG.....CCTGTC <b>AG</b> |
| <b>GT</b> GAGCAA.....GCATCC <b>AG</b> | GATTTC.....TGCCAG | <b>GT</b> GGGTCC.....CTCCCC <b>AG</b> | CAAGCC.....CTGGGG    | <b>GT</b> GAGGTG.....CCTGTC <b>AG</b> |
| <b>GT</b> GATCAG.....GCGTCC <b>AG</b> | GACTTC.....TGCCAG | <b>GT</b> GGGTCC.....CTCCCC <b>AG</b> | CAAGCC.....CTGGGG    | <b>GT</b> GAGGTG.....CCTGTC <b>AG</b> |
| <b>GT</b> GAGCAG.....GCGTCC <b>AG</b> | GACTTC.....TGCCAG | <b>GT</b> GGGTCC.....CTCCCC <b>AG</b> | CAAGCC.....CTGGGG    | <b>GT</b> GAGGTG.....CCTGTC <b>AG</b> |
| <b>GT</b> GAGCGA.....GCATCC <b>AG</b> | GACTTC.....TGCCAG | <b>GT</b> GGCTCC.....CCCCTTC...       | ...TCTCCC.....CTGGGG | <b>GT</b> GAGGTG.....CCTGTC <b>AG</b> |

Continued table

| Exon8             | Intron8                               | Exon9             | Intron9                               | Exon10            |
|-------------------|---------------------------------------|-------------------|---------------------------------------|-------------------|
| GAATCC.....TCGGCT | <b>GT</b> GAGTCT.....GCCTGC <b>AG</b> | CACGAC.....CGCAGG | <b>GT</b> GAGGAG.....TCCTCC <b>AG</b> | GGATGT.....CCGCAG |
| GAATCC.....TCGGCT | <b>GT</b> GAGTCT.....GCCTGC <b>AG</b> | CGCGAC.....GACGCA | <b>GT</b> GTGAGG.....CCCTCC <b>AG</b> | GGATGT.....CCGCAG |
| GAATCC.....TCGGCT | <b>GT</b> GAGTCT.....GCCTGC <b>AG</b> | CGCGAC.....GACGCA | <b>GG</b> GTGGTA.....CCCTCC <b>AG</b> | GGATGT.....CCGCAG |
| GAATCT.....TCGGCT | <b>GT</b> GAGTCT.....GCCTGC <b>AA</b> | CACGAC.....CGCAGG | <b>GT</b> GAGGAG.....TCCTAC <b>AG</b> | GGATGT.....CCGCAG |
| GAATCC.....TCGGCT | <b>GT</b> GAGTCT.....GCCTGC <b>AG</b> | CGCGAC.....GACGCA | <b>GG</b> GTGAGG.....CCCTCC <b>AG</b> | GGATGT.....CCGCAG |
| GAATCC.....TCGGCT | <b>GT</b> GAGTCT.....GCCCGC <b>AG</b> | CGCGAC.....CGCAGG | <b>GT</b> GAGGAG.....CCTCCA <b>AG</b> | GATGTC.....CCGCAG |
| GAATCC.....TCGGCT | <b>GT</b> GAGTCT.....GCCCGC <b>AG</b> | CACGAC.....CACAGG | <b>GT</b> GAGGAG.....CCCTCC <b>AG</b> | GAATGT.....CCGCAG |

Continued table

| Intron10                             | Exon11               |
|--------------------------------------|----------------------|
| <b>GT</b> GACGGC.....CCCCC <b>AG</b> | CCACCG.....CCCGTGTGA |
| .....                                | CCACCG.....CCCCTGTGA |
| <b>GT</b> GACGGC.....CCCCG <b>AG</b> | CCACCG.....CCCCTGTGA |
| <b>GT</b> GACGGC.....CCCCC <b>AG</b> | CCACCG.....CCCGTGTGA |
| <b>GT</b> GACGGC.....CCCTG <b>AG</b> | CCACCG.....GCCCTGTGA |
| <b>GT</b> GACGGC.....                | CCACCG.....GCCTGG    |
| <b>GT</b> GACGGC.....                |                      |

NOTE: The red GT/AG is the normal boundary of intro/exon. The blue color represents the splice mutation.

Appendix Table 5 Likelihood and  $\omega$  values estimated under two ratio branch model on *ACPT* gene among toothless and enamel-less branches.

| Models and some relative branches                                                                                                  | $\omega$                          | -ln L     | np  | Models comparison | 2 $\Delta$ (ln L) | P-value |
|------------------------------------------------------------------------------------------------------------------------------------|-----------------------------------|-----------|-----|-------------------|-------------------|---------|
| <b>The terminal branch of <i>Balaenoptera physalus</i></b>                                                                         |                                   |           |     |                   |                   |         |
| A. All branches have one $\omega$                                                                                                  | 0.118                             | 23204.622 | 208 |                   |                   |         |
| B. All branches have one $\omega = 1$                                                                                              | 1                                 | 25437.563 | 207 | A vs B            | 4465.882          | 0       |
| C. The terminal branch of <i>Balaenoptera physalus</i> with pseudogenized <i>ACPT</i> has $\omega_2$ , others have $\omega_1$      | $\omega_1=0.116$ $\omega_2=1.883$ | 23190.070 | 209 | A vs C            | 29.104            | <0.01   |
| D. The terminal branch of <i>Balaenoptera physalus</i> with pseudogenized <i>ACPT</i> has $\omega_2 = 1$ , others have $\omega_1$  | $\omega_1=0.116$ $\omega_2=1$     | 23190.624 | 208 | D vs C            | 1.108             | 0.293   |
| <b>The terminal branch of <i>Megaptera novaeangliae</i></b>                                                                        |                                   |           |     |                   |                   |         |
| A. All branches have one $\omega$                                                                                                  | 0.117                             | 23161.978 | 208 |                   |                   |         |
| B. All branches have one $\omega = 1$                                                                                              | 1                                 | 25405.725 | 207 | A vs B            | 4487.494          | 0       |
| C. The terminal branch of <i>Megaptera novaeangliae</i> with pseudogenized <i>ACPT</i> has $\omega_2$ , others have $\omega_1$     | $\omega_1=0.116$ $\omega_2=0.641$ | 23156.277 | 209 | A vs C            | 11.402            | <0.01   |
| D. The terminal branch of <i>Megaptera novaeangliae</i> with pseudogenized <i>ACPT</i> has $\omega_2 = 1$ , others have $\omega_1$ | $\omega_1=0.116$ $\omega_2=1$     | 23156.626 | 208 | D vs C            | 0.698             | 0.403   |
| <b>The terminal branch of <i>Balaena mysticetus</i></b>                                                                            |                                   |           |     |                   |                   |         |
| A. All branches have one $\omega$                                                                                                  | 0.117                             | 23149.887 | 208 |                   |                   |         |
| B. All branches have one $\omega = 1$                                                                                              | 1                                 | 25394.078 | 207 | A vs B            | 4488.382          | 0       |
| C. The terminal branch of <i>Balaena mysticetus</i> with pseudogenized                                                             | $\omega_1=0.116$ $\omega_2=0.551$ | 23146.023 | 209 | A vs C            | 7.728             | <0.01   |

*ACPT* has  $\omega_2$ , others have  $\omega_1$

D. The terminal branch of *Balaena mysticetus* with pseudogenized *ACPT* has  $\omega_2 = 1$ , others have  $\omega_1$

$\omega_1=0.116$   $\omega_2=1$  23146.532 208 D vs C 0.509 0.476

**The terminal branch of *Eschrichtius robustus***

A. All branches have one  $\omega$

0.117 23181.416 208

B. All branches have one  $\omega = 1$

1 25415.085 207 A vs B 4467.338 0

C. The terminal branch of *Eschrichtius robustus* with pseudogenized *ACPT* has  $\omega_2$ , others have  $\omega_1$

$\omega_1=0.116$   $\omega_2=2.688$  23167.178 209 A vs C 14.238 <0.01

D. The terminal branch of *Eschrichtius robustus* with pseudogenized *ACPT* has  $\omega_2 = 1$ , others have  $\omega_1$

$\omega_1=0.116$   $\omega_2=1$  23168.159 208 D vs C 1.962 0.161

**The terminal branch of *Balaenoptera musculus***

A. All branches have one  $\omega$

0.117 23199.599 208

B. All branches have one  $\omega = 1$

1 25435.255 207 A vs B 4471.312 0

C. The terminal branch of *Balaenoptera musculus* with pseudogenized *ACPT* has  $\omega_2$ , others have  $\omega_1$

$\omega_1=0.116$   $\omega_2=1.395$  23187.344 209 A vs C 24.510 <0.01

D. The terminal branch of *Balaenoptera musculus* with pseudogenized *ACPT* has  $\omega_2 = 1$ , others have  $\omega_1$

$\omega_1=0.116$   $\omega_2=1$  23188.136 208 D vs C 1.584 0.208

**The terminal branch of *Eubalaena glacialis***

A. All branches have one  $\omega$

0.117 23163.917 208

B. All branches have one  $\omega = 1$

1 25407.391 207 A vs B 4486.948 0

C. The terminal branch of *Eubalaena glacialis* with pseudogenized

$\omega_1=0.116$   $\omega_2=0.503$  23159.695 209 A vs C 8.444 <0.01

*ACPT* has  $\omega_2$ , others have  $\omega_1$

|                                                                                                                                 |                  |              |           |     |        |       |       |
|---------------------------------------------------------------------------------------------------------------------------------|------------------|--------------|-----------|-----|--------|-------|-------|
| D. The terminal branch of <i>Eubalaena glacialis</i> with pseudogenized <i>ACPT</i> has $\omega_2 = 1$ , others have $\omega_1$ | $\omega_1=0.116$ | $\omega_2=1$ | 23160.587 | 208 | D vs C | 1.784 | 0.182 |
|---------------------------------------------------------------------------------------------------------------------------------|------------------|--------------|-----------|-----|--------|-------|-------|

**The terminal branch of *Balaenoptera bonaerensis***

|                                                                                                                                      |                  |                  |           |     |        |          |       |
|--------------------------------------------------------------------------------------------------------------------------------------|------------------|------------------|-----------|-----|--------|----------|-------|
| A. All branches have one $\omega$                                                                                                    | 0.117            |                  | 23200.981 | 208 |        |          |       |
| B. All branches have one $\omega = 1$                                                                                                | 1                |                  | 25437.712 | 207 | A vs B | 4473.462 | 0     |
| C. The terminal branch of <i>Balaenoptera bonaerensis</i> with pseudogenized <i>ACPT</i> has $\omega_2$ , others have $\omega_1$     | $\omega_1=0.116$ | $\omega_2=1.045$ | 23190.135 | 209 | A vs C | 21.692   | <0.01 |
| D. The terminal branch of <i>Balaenoptera bonaerensis</i> with pseudogenized <i>ACPT</i> has $\omega_2 = 1$ , others have $\omega_1$ | $\omega_1=0.116$ | $\omega_2=1$     | 23190.138 | 208 | D vs C | 0.006    | 0.938 |

**The terminal branch of *Balaenoptera acutorostrata***

|                                                                                                                                        |                  |                  |           |     |        |          |       |
|----------------------------------------------------------------------------------------------------------------------------------------|------------------|------------------|-----------|-----|--------|----------|-------|
| A. All branches have one $\omega$                                                                                                      | 0.117            |                  | 23178.238 | 208 |        |          |       |
| B. All branches have one $\omega = 1$                                                                                                  | 1                |                  | 25420.510 | 207 | A vs B | 4484.544 | 0     |
| C. The terminal branch of <i>Balaenoptera acutorostrata</i> with pseudogenized <i>ACPT</i> has $\omega_2$ , others have $\omega_1$     | $\omega_1=0.116$ | $\omega_2=0.613$ | 23172.147 | 209 | A vs C | 12.182   | <0.01 |
| D. The terminal branch of <i>Balaenoptera acutorostrata</i> with pseudogenized <i>ACPT</i> has $\omega_2 = 1$ , others have $\omega_1$ | $\omega_1=0.116$ | $\omega_2=1$     | 23172.621 | 208 | D vs C | 0.948    | 0.330 |

**The terminal branch of *Balaenoptera borealis***

|                                                             |                  |                  |           |     |        |          |       |
|-------------------------------------------------------------|------------------|------------------|-----------|-----|--------|----------|-------|
| A. All branches have one $\omega$                           | 0.118            |                  | 23231.146 | 208 |        |          |       |
| B. All branches have one $\omega = 1$                       | 1                |                  | 25466.547 | 207 | A vs B | 4470.802 | 0     |
| C. The terminal branch of <i>Balaenoptera borealis</i> with | $\omega_1=0.116$ | $\omega_2=0.902$ | 23219.198 | 209 | A vs C | 23.896   | <0.01 |

pseudogenized *ACPT* has  $\omega_2$ , others have  $\omega_1$

D. The terminal branch of *Balaenoptera borealis* with pseudogenized *ACPT* has  $\omega_2 = 1$ , others have  $\omega_1$   $\omega_1=0.116$   $\omega_2=1$  23219.224 208 D vs C 0.052 0.820

### The stem group of Mysticeti

A. All branches have one  $\omega$  0.121 23747.298 224

B. All branches have one  $\omega = 1$  1 25976.514 223 A vs B 4458.432 0

C. The ancestral branch of stem mysticeti with *ACPT* has  $\omega_2$ , others have  $\omega_1$   $\omega_1=0.120$   $\omega_2=1.436$  23741.059 225 A vs C 12.478 <0.01

D. The ancestral branch of stem mysticeti with *ACPT* has  $\omega_2 = 1$ , others have  $\omega_1$   $\omega_1=0.116$   $\omega_2=1$  23741.164 224 D vs C 0.210 0.647

### The crown group of Mysticeti

A. All branches have one  $\omega$  0.121 23747.298 224

B. All branches have one  $\omega = 1$  1 25976.514 223 A vs B 4458.432 0

C. The clade of crown mysticeti with *ACPT* has  $\omega_2$ , others have  $\omega_1$   $\omega_1=0.116$   $\omega_2=0.522$  23720.907 225 A vs C 52.782 <0.01

D. The clade of crown mysticeti with *ACPT* has  $\omega_2 = 1$ , others have  $\omega_1$   $\omega_1=$   $\omega_2=1$  23725.565 224 D vs C 9.316 <0.01

### The terminal branch of *Kogia breviceps*

A. All branches have one  $\omega$  0.117 23212.116 208

B. All branches have one  $\omega = 1$  1 25455.901 207 A vs B 4487.570 0

C. The clade of *Kogia breviceps* with *ACPT* has  $\omega_2$ , others have  $\omega_1$   $\omega_1=0.116$   $\omega_2=0.581$  23203.192 209 A vs C 17.848 <0.01

|                                                                                                                                  |                  |                  |           |     |        |          |       |
|----------------------------------------------------------------------------------------------------------------------------------|------------------|------------------|-----------|-----|--------|----------|-------|
| D. The clade of <i>Kogia breviceps</i> with <i>ACPT</i> has $\omega_2 = 1$ , others have $\omega_1$                              | $\omega_1=0.116$ | $\omega_2=1$     | 23204.052 | 208 | D vs C | 1.720    | 0.190 |
| <b>The terminal branch of <i>Dasypus novemcinctus</i></b>                                                                        |                  |                  |           |     |        |          |       |
| A. All branches have one $\omega$                                                                                                | 0.117            |                  | 23387.077 | 208 |        |          |       |
| B. All branches have one $\omega = 1$                                                                                            | 1                |                  | 25653.621 | 207 | A vs B | 4533.088 | 0     |
| C. The terminal branch of <i>Dasypus novemcinctus</i> with pseudogenized <i>ACPT</i> has $\omega_2$ , others have $\omega_1$     | $\omega_1=0.116$ | $\omega_2=0.206$ | 23384.542 | 209 | A vs C | 5.070    | 0.024 |
| D. The terminal branch of <i>Dasypus novemcinctus</i> with pseudogenized <i>ACPT</i> has $\omega_2 = 1$ , others have $\omega_1$ | $\omega_1=0.116$ | $\omega_2=1$     | 23403.931 | 208 | D vs C | 38.778   | <0.01 |
| <b>The terminal branch of <i>Orycteropus afer</i></b>                                                                            |                  |                  |           |     |        |          |       |
| A. All branches have one $\omega$                                                                                                | 0.119            |                  | 23456.631 | 208 |        |          |       |
| B. All branches have one $\omega = 1$                                                                                            | 1                |                  | 25695.648 | 207 | A vs B | 4478.034 | 0     |
| C. The terminal branch of <i>Orycteropus afer</i> with pseudogenized <i>ACPT</i> has $\omega_2$ , others have $\omega_1$         | $\omega_1=0.116$ | $\omega_2=0.414$ | 23441.822 | 209 | A vs C | 29.618   | <0.01 |
| D. The terminal branch of <i>Orycteropus afer</i> with pseudogenized <i>ACPT</i> has $\omega_2 = 1$ , others have $\omega_1$     | $\omega_1=0.116$ | $\omega_2=1$     | 23448.875 | 208 | D vs C | 14.106   | <0.01 |

## References:

- Celine S, Khalid B, Jimmy L, Rémy D, Frédéric DE, J P Douzery Vincent, Ranwez: OrthoMaM v10: Scaling-up orthologous coding sequence and exon alignments with more than one hundred mammalian genomes. *Molecular Biology and Evolution* 2019, 36(4):861-862.
- Gatesy J, Geisler JH, Chang J, Buell C, Berta A, Meredith RW, Springer MS, Mcgowen MR: A phylogenetic blueprint for a modern whale. *Molecular Phylogenetics and Evolution* 2013, 66(2):479-506.
- Kuntner M, May-Collado LJ, Agnarsson I: Phylogeny and conservation priorities of afrotherian mammals (Afrotheria, Mammalia). *Zoologica Scripta* 2011, 40(1):1-15.
- OrthoMaM: [http://orthomam2.mbb.univ-montp2.fr/OrthoMaM\\_v10b10/](http://orthomam2.mbb.univ-montp2.fr/OrthoMaM_v10b10/).
- Sergey N, Montoya-Burgos JI, Margulies EH, Jacques R, Bruno N, Antonarakis SE: Early history of mammals is elucidated with the ENCODE multiple species sequencing data. *PLoS Genetics* 2007, 3(1):e2.
- Seymen F, Kim YJ, Lee YJ, Kang J, Kim TH, Choi H, Koruyucu M, Kasimoglu Y, Tuna EB, Gencay K: Recessive mutations in ACPT, encoding testicular acid phosphatase, cause hypoplastic amelogenesis imperfecta. *American Journal of Human Genetics* 2016, 99(5):1199-1205.
- Smith CE, Whitehouse LL, Poulter JA, Brookes SJ, Day PF, Soldani F, Kirkham J, Inglehearn CF, Mighell AJ: Defects in the acid phosphatase ACPT cause recessive hypoplastic amelogenesis imperfecta. *European Journal of Human Genetics* 2017, 25(8):1015-1019.
- Waddell PJ, Kishino H, Ota R: A Phylogenetic Foundation for Comparative Mammalian Genomics. *Genome Informatics* 2001, 12:141-154.
- Xuming Z, Shixia X, Junxiao X, Bingyao C, Kaiya Z, Guang Y: Phylogenomic analysis resolves the interordinal relationships and rapid diversification of the laurasiatherian mammals. 2012, 61(1):150-164.
